# Supplementary material
Source: ML conference proceedings conference paper supplement (https://proceedings.mlr.press/v80/srinivas18a.html)
Supplement: Supplementary file [file srinivas18a-supp.pdf]

---

# Supplementary Material for “Knowledge Transfer with Jacobian Matching”

---

Suraj Srinivas<sup>1</sup> François Fleuret<sup>1</sup>

## 1. Proof for Proposition 1

**Proposition.** Consider the squared error cost function for matching soft targets of two neural networks with  $k$ -length targets ( $\in \mathbb{R}^k$ ), given by  $\ell(\mathcal{T}(\mathbf{x}), \mathcal{S}(\mathbf{x})) = \sum_{i=1}^k (\mathcal{T}^i(\mathbf{x}) - \mathcal{S}^i(\mathbf{x}))^2$ , where  $\mathbf{x} \in \mathbb{R}^D$  is an input data point. Let  $\boldsymbol{\xi} (\in \mathbb{R}^D) = \sigma \mathbf{z}$  be a scaled version of a unit normal random variable  $\mathbf{z} \in \mathbb{R}^D$  with scaling factor  $\sigma \in \mathbb{R}$ . Then the following is locally true.

$$\begin{aligned} & \mathbb{E}_{\boldsymbol{\xi}} \left[ \sum_{i=1}^k (\mathcal{T}^i(\mathbf{x} + \boldsymbol{\xi}) - \mathcal{S}^i(\mathbf{x} + \boldsymbol{\xi}))^2 \right] \\ &= \sum_{i=1}^k (\mathcal{T}^i(\mathbf{x}) - \mathcal{S}^i(\mathbf{x}))^2 + \sigma^2 \sum_{i=1}^k \|\nabla_x \mathcal{T}^i(\mathbf{x}) - \nabla_x \mathcal{S}^i(\mathbf{x})\|_2^2 \\ &+ \mathcal{O}(\sigma^4) \end{aligned}$$

*Proof.* There exists  $\sigma$  and  $\boldsymbol{\xi}$  small enough that first-order Taylor series expansion holds true

$$\begin{aligned} & \mathbb{E}_{\boldsymbol{\xi}} \left[ \sum_{i=1}^k (\mathcal{T}^i(\mathbf{x} + \boldsymbol{\xi}) - \mathcal{S}^i(\mathbf{x} + \boldsymbol{\xi}))^2 \right] \\ &= \mathbb{E}_{\boldsymbol{\xi}} \left[ \sum_{i=1}^k (\mathcal{T}^i(\mathbf{x}) + \boldsymbol{\xi}^T \nabla_x \mathcal{T}^i(\mathbf{x}) - \mathcal{S}^i(\mathbf{x}) - \boldsymbol{\xi}^T \nabla_x \mathcal{S}^i(\mathbf{x}))^2 \right] \\ &+ \mathcal{O}(\sigma^4) \\ &= \sum_{i=1}^k (\mathcal{T}^i(\mathbf{x}) - \mathcal{S}^i(\mathbf{x}))^2 \\ &+ \mathbb{E}_{\boldsymbol{\xi}} \left[ \sum_{i=1}^k [\boldsymbol{\xi}^T (\nabla_x \mathcal{T}^i(\mathbf{x}) - \nabla_x \mathcal{S}^i(\mathbf{x}))]^2 \right] + \mathcal{O}(\sigma^4) \quad (1) \end{aligned}$$

To get equation 1, we use the fact that mean of  $\boldsymbol{\xi}$  is zero. To

---

<sup>1</sup>Idiap Research Institute & EPFL, Switzerland. Correspondence to: Suraj Srinivas <suraj.srinivas@idiap.ch>.

complete the proof, we use the diagonal assumption on the covariance matrix of  $\boldsymbol{\xi}$ . □

Proofs of other statements are similar. For proof for cross-entropy loss of Proposition 2, use a second order Taylor series expansion of  $\log(\cdot)$  in the first step.

## 2. Proof for Proposition 3

**Proposition.** From the notations in the main text, we have

$$\begin{aligned} \frac{1}{|\mathcal{D}_l|} \sum_{\mathbf{x} \sim \mathcal{D}_l} \ell(f(\mathbf{x}), g(\mathbf{x})) &\leq \max_{\mathbf{x} \sim \mathcal{D}_s} \ell(f(\mathbf{x}), g(\mathbf{x})) \\ &+ K\mathcal{H}_a(\mathcal{D}_l, \mathcal{D}_s) \end{aligned}$$

*Proof.* Let us denote  $\rho(\mathbf{x}) = \ell(f(\mathbf{x}), g(\mathbf{x}))$  for convenience. Assume Lipschitz continuity for  $\rho(\mathbf{x})$  with Lipschitz constant  $K$ , and distance metric  $\psi_{\mathbf{x}}(\cdot, \cdot)$  in the input space -

$$\begin{aligned} \|\rho(\mathbf{x}_1) - \rho(\mathbf{x}_2)\|_1 &\leq K\psi_{\mathbf{x}}(\mathbf{x}_1, \mathbf{x}_2) \\ \implies \rho(\mathbf{x}_1) &\leq \rho(\mathbf{x}_2) + K\psi_{\mathbf{x}}(\mathbf{x}_1, \mathbf{x}_2) \end{aligned}$$

Assuming that  $\rho(\mathbf{x}_1) \geq \rho(\mathbf{x}_2)$ . Note that it holds even otherwise, but is trivial.

Now, for every datapoint  $\mathbf{x}_l \in \mathcal{D}_l$ , there exists a point  $\mathbf{x}_s \in \mathcal{D}_s$  such that  $\psi_{\mathbf{x}}(\mathbf{x}_s, \mathbf{x}_l)$  is the smallest among all points in  $\mathcal{D}_s$ . In other words, we look at the point in  $\mathcal{D}_s$  closest to each point  $\mathbf{x}_l$ . Note that in this process only a subset of points  $\mathcal{d}_s \subseteq \mathcal{D}_s$  are chosen, and individual points can be chosen multiple times. For these points, we can write

$$\begin{aligned} \rho(\mathbf{x}_l) &\leq \rho(\mathbf{x}_s) + K\psi_{\mathbf{x}}(\mathbf{x}_s, \mathbf{x}_l) \\ \implies \frac{1}{|\mathcal{D}_l|} \sum_{\mathbf{x}_l \sim \mathcal{D}_l} \rho(\mathbf{x}_l) &\leq \frac{1}{|\mathcal{D}_l|} \sum_{\mathbf{x}_s \text{ closest to } \mathbf{x}_l} \rho(\mathbf{x}_s) \\ &+ \frac{1}{|\mathcal{D}_l|} \sum_{\mathbf{x}_s \text{ closest to } \mathbf{x}_l} K\psi_{\mathbf{x}}(\mathbf{x}_s, \mathbf{x}_l) \end{aligned}$$

We see that  $\frac{1}{|\mathcal{D}_l|} \sum_{\mathbf{x}_s} \rho(\mathbf{x}_s) \leq \max_{\mathbf{x} \sim \mathcal{D}_s} \rho(\mathbf{x}) \leq \max_{\mathbf{x} \sim \mathcal{D}_s} \rho(\mathbf{x})$ , which is a consequence of the fact that the max is greater than any convex combination of elements.

Also, we have  $\psi_{\mathbf{x}}(\mathbf{x}_l, \mathbf{x}_s) \leq \mathcal{H}_a(\mathcal{D}_l, \mathcal{D}_s)$ , which is the maximum distance between any two ‘closest’ points from  $\mathcal{D}_l$  to  $\mathcal{D}_s$  (by definition).

Applying these bounds, we have the final result.  $\square$

## 2.1. Proof for Corollary

**Corollary.** *For any superset  $\mathcal{D}'_s \supseteq \mathcal{D}_s$  of the target dataset,  $\mathcal{H}_a(\mathcal{D}_l, \mathcal{D}'_s) \leq \mathcal{H}_a(\mathcal{D}_l, \mathcal{D}_s)$*

*Proof.* From the previous proof, we have  $\rho(\mathbf{x}_l) \leq \rho(\mathbf{x}_s) + K\psi_{\mathbf{x}}(\mathbf{x}_s, \mathbf{x}_l)$  for an individual point  $\mathbf{x}_l$ . Now if we have  $\mathcal{D}'_s \supseteq \mathcal{D}_s$ , then we have  $\rho(\mathbf{x}_l) \leq \rho(\mathbf{x}'_s) + K\psi_{\mathbf{x}}(\mathbf{x}'_s, \mathbf{x}_l)$ , where  $\mathbf{x}'_s$  is the new point closest to  $\mathbf{x}_l$ . It is clear that  $\psi_{\mathbf{x}}(\mathbf{x}'_s, \mathbf{x}_l) \leq \psi_{\mathbf{x}}(\mathbf{x}_s, \mathbf{x}_l)$  for all  $\mathbf{x}_l$ . Hence it follows that  $\mathcal{H}_a(\mathcal{D}_l, \mathcal{D}'_s) \leq \mathcal{H}_a(\mathcal{D}_l, \mathcal{D}_s)$ .  $\square$

## 3. Justification for Jacobian loss

We use the following loss term for Jacobian matching for transfer learning.

$$\text{Match Jacobians} = \left\| \frac{\nabla_x f(\mathbf{x})}{\|\nabla_x f(\mathbf{x})\|_2} - \frac{\nabla_x g(\mathbf{x})}{\|\nabla_x g(\mathbf{x})\|_2} \right\|_2^2 \quad (2)$$

We can show that the above loss term corresponds to adding a noise term  $\xi_f \propto \|\nabla_x f(\mathbf{x})\|_2^{-1}$  for  $f(\mathbf{x})$  and  $\xi_g \propto \|\nabla_x g(\mathbf{x})\|_2^{-1}$  for  $g(\mathbf{x})$  for the distillation loss. From the first order Taylor series expansion, we see that  $g(x + \xi) = g(x) + \xi_g \nabla_x g(\mathbf{x})$ . Thus for networks  $f(\cdot)$  and  $g(\cdot)$  with different Jacobian magnitudes, we expect different responses for the same noisy inputs. Specifically, we see that  $\mathbb{E}_{\xi_g} \|g(x + \xi_g) - g(x)\|_2^2 = \sigma_g^2 \|\nabla_x g(\mathbf{x})\|_2^2 = \sigma^2 \frac{\|\nabla_x g(\mathbf{x})\|_2^2}{\|\nabla_x g(\mathbf{x})\|_2^2} = \sigma^2$  for a gaussian model with covariance matrix being  $\sigma$  times the identity.

## 4. Experimental details

### 4.1. VGG Network Architectures

The architecture for our networks follow the VGG design philosophy. Specifically, we have blocks with the following elements:

- $3 \times 3$  conv kernels with  $c$  channels of stride 1

- Batch Normalization
- ReLU

Whenever we use Max-pooling (M), we use stride 2 and window size 2.

The architecture for VGG-9 is -  $[64 - M - 128 - M - 256 - 256 - M - 512 - 512 - M - 512 - 512 - M]$ . Here, the number stands for the number of convolution channels, and  $M$  represents max-pooling. At the end of all the convolutional and max-pooling layers, we have a Global Average Pooling (GAP) layer, after which we have a fully connected layer leading up to the final classes. Similar architecture is used for the case of both CIFAR and MIT Scene experiments.

The architecture for VGG-4 is -  $[64 - M - 128 - M - 512 - M]$ .

### 4.2. Loss function

The loss function for distillation experiments use the following form.

$$\ell(\mathcal{S}, \mathcal{T}) = \alpha \times (\text{CE}) + \beta \times (\text{Match Activations}) + \gamma \times (\text{Match Jacobians})$$

In our experiments,  $\alpha, \beta, \gamma$  are either set to 1 or 0. In other words, all regularization constants are 1.

Here, ‘CE’ refers to cross-entropy with ground truth labels. ‘Match Activations’ refers to squared error term over pre-softmax activations of the form  $(y_s - y_t)^2$ . ‘Match Jacobians’ refers to the same squared error term, but for Jacobians.

For the MIT Scene experiments,  $\alpha, \beta, \gamma$  are either set to 10 or 0, depending on the specific method. To compute the Jacobian, we use average pooling over a *feature size*/5 window with a stride of 1. We match the Jacobian after the first residual block for resnet, and after the second max-pool for VGG. This corresponds to feature level “1” in the ablation experiments.

### 4.3. Optimization

For CIFAR100 experiments, we run optimization for 500 epochs. We use the Adam optimizer, with an initial learning rate of  $1e-3$ , and a single learning rate annealing (to  $1e-4$ ) at 400 epochs. We used a batch size of 128.

For MIT Scenes, we used SGD with momentum of 0.9, for 75 epochs. The initial learning rate is  $1e-3$ , and it is reduced 10 times after 40 and 60 epochs. We used batch size 8. This is because the Jacobian computation is very memory intensive.
